# Supplementary figures and images for: PTBP1 is required for glucose-stimulated cap-independent translation of insulin granule proteins and Coxsackieviruses in beta cells
Source: PubMed Central journal article supplement — Mol Metab. 2014 May 14;3(5):518–30. doi: 10.1016/j.molmet.2014.05.002 (PMC4099505; doi:10.1016/j.molmet.2014.05.002), 2014-05-14

# Figure S1

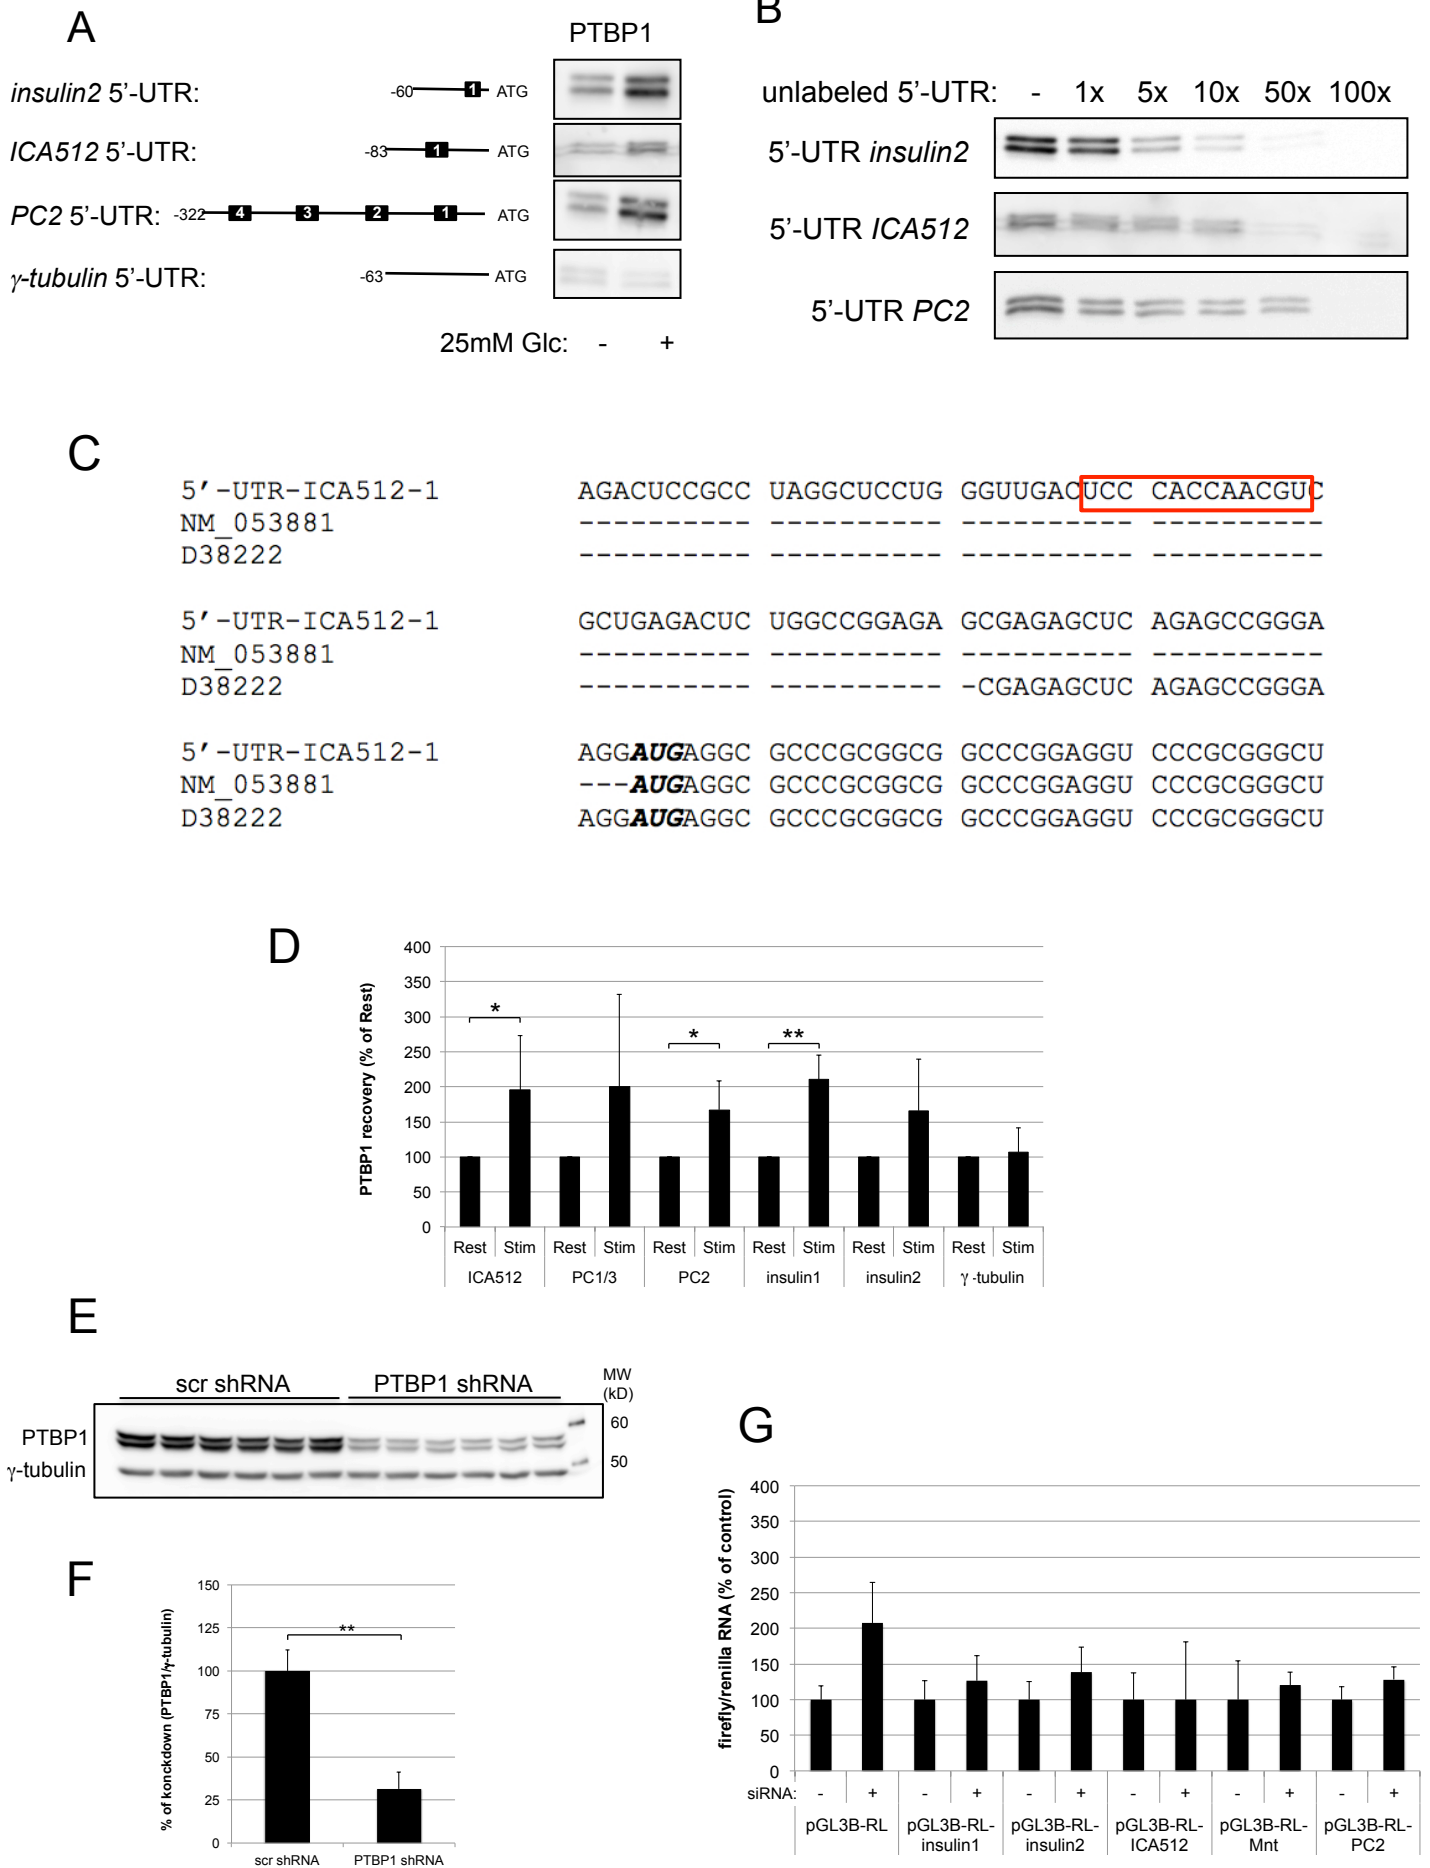

Supplement: mmc2.pdf [file mmc2.pdf]

Figure S3

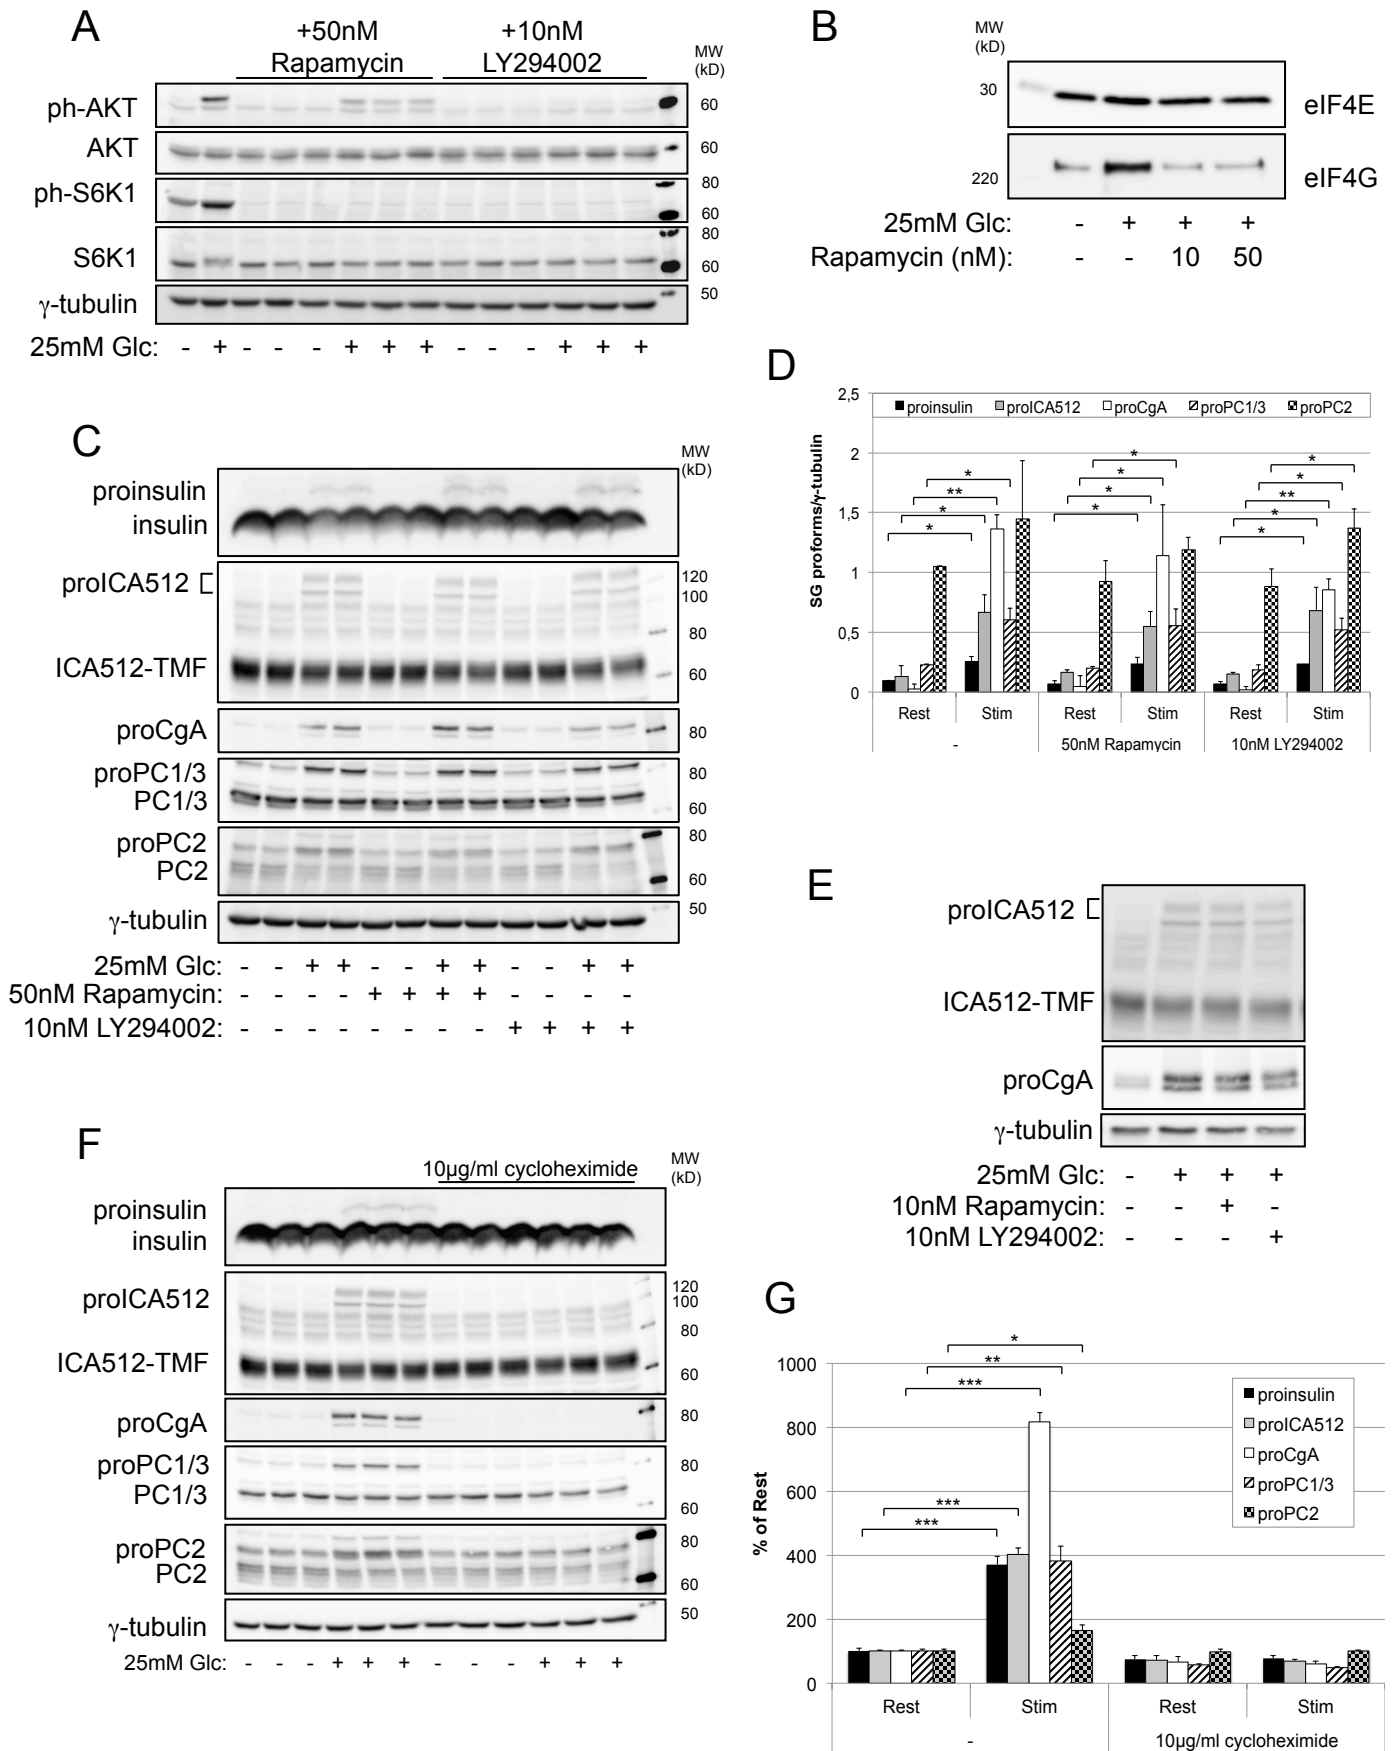

Supplement: mmc3.pdf [file mmc3.pdf]

Figure S6

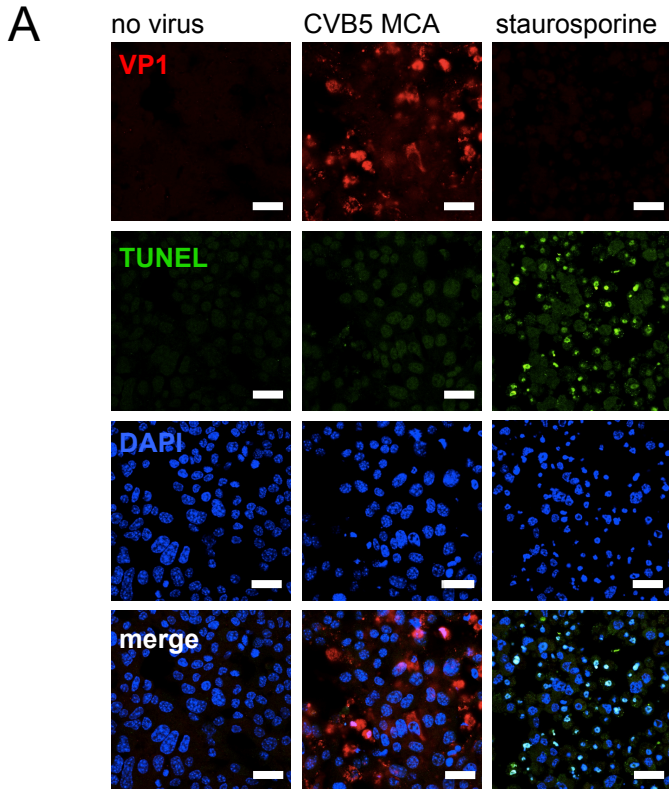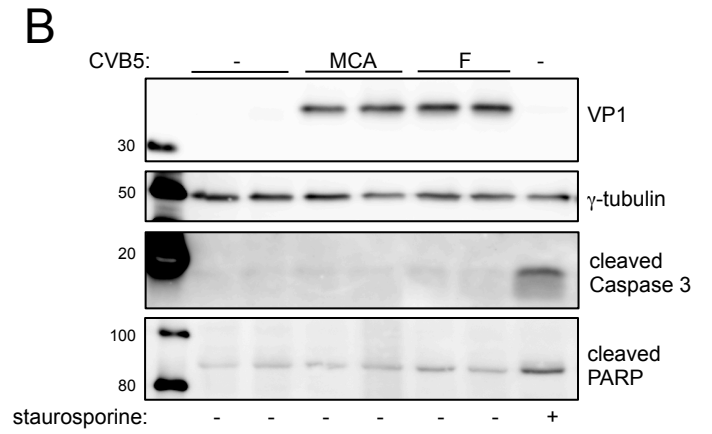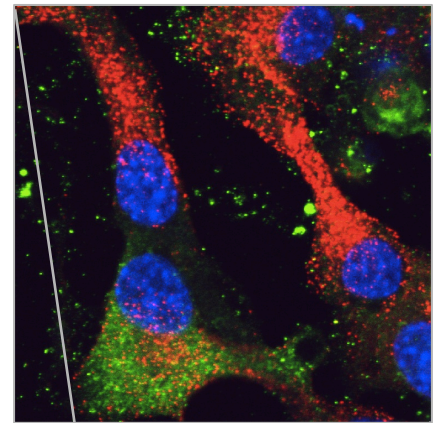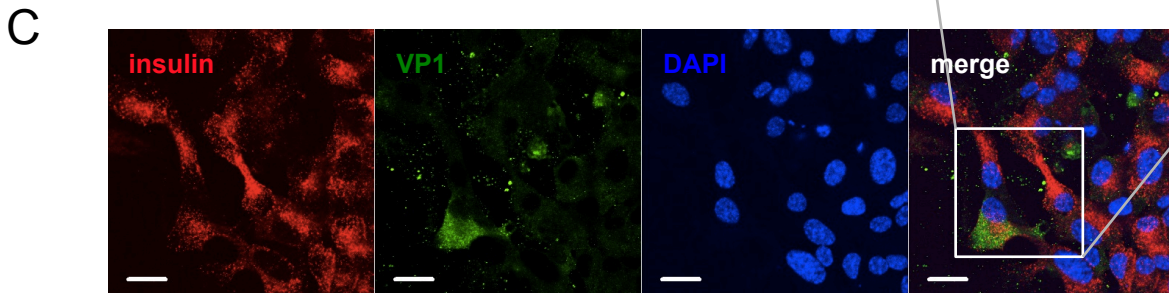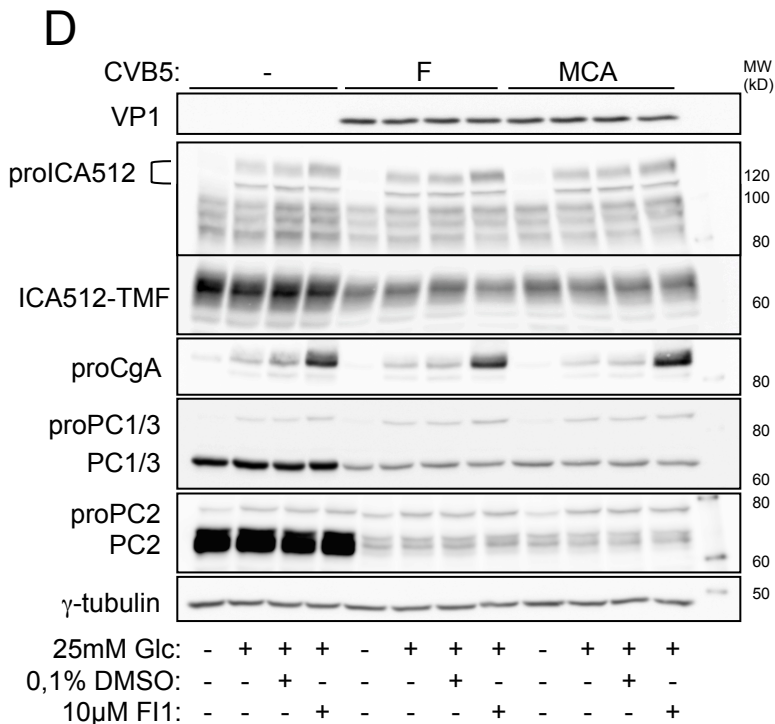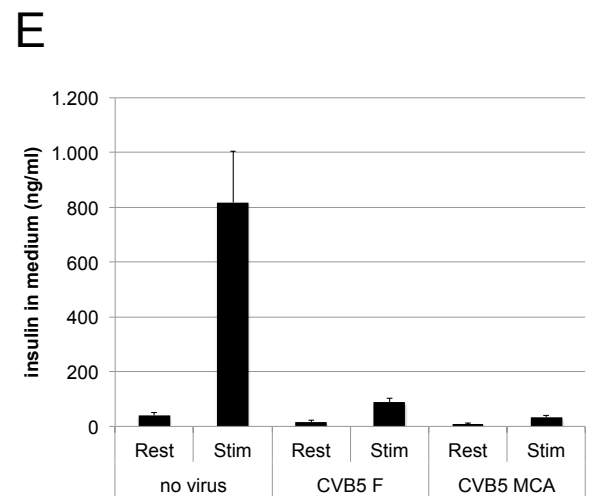

Supplement: mmc4.pdf [file mmc4.pdf]
